# Supplementary material for: The Diversity and Heterogeneity of TCR and BCR in Pan-Cancer
Source: Research Square preprint supplement (doi:10.21203/rs.3.rs-926802/v1), 2021-10-25
Supplement: Supplementary file 1 [file 15da603034210b4c45378f93.docx]

**Supplementary material**


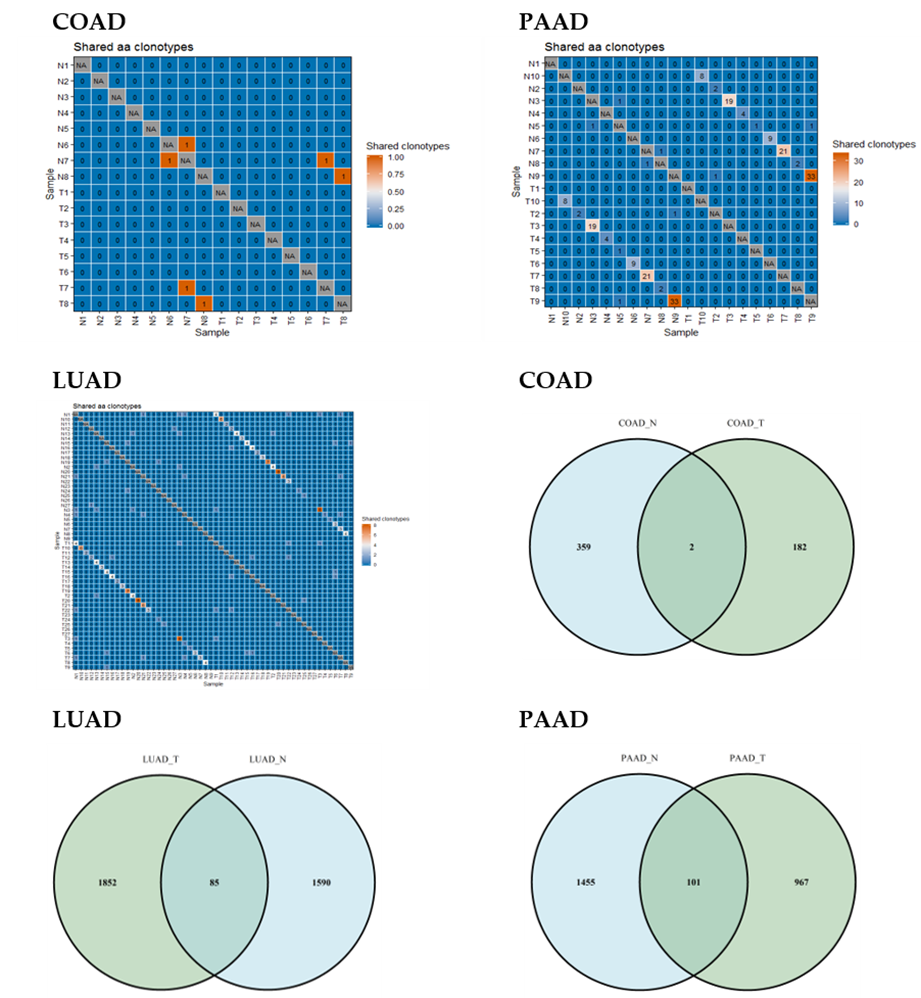


**Figure S1** number of shared TRB sequences of COAD, LUAD, PAAD


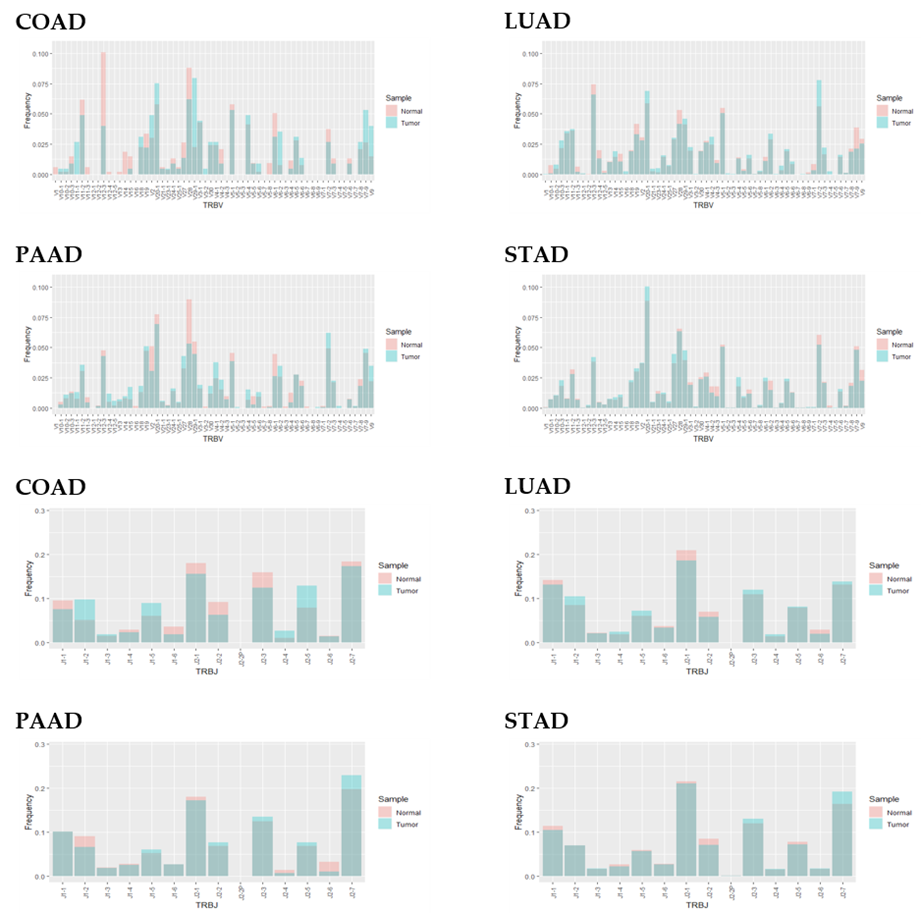


**Figure S2** The usage of TRBV and TRBJ


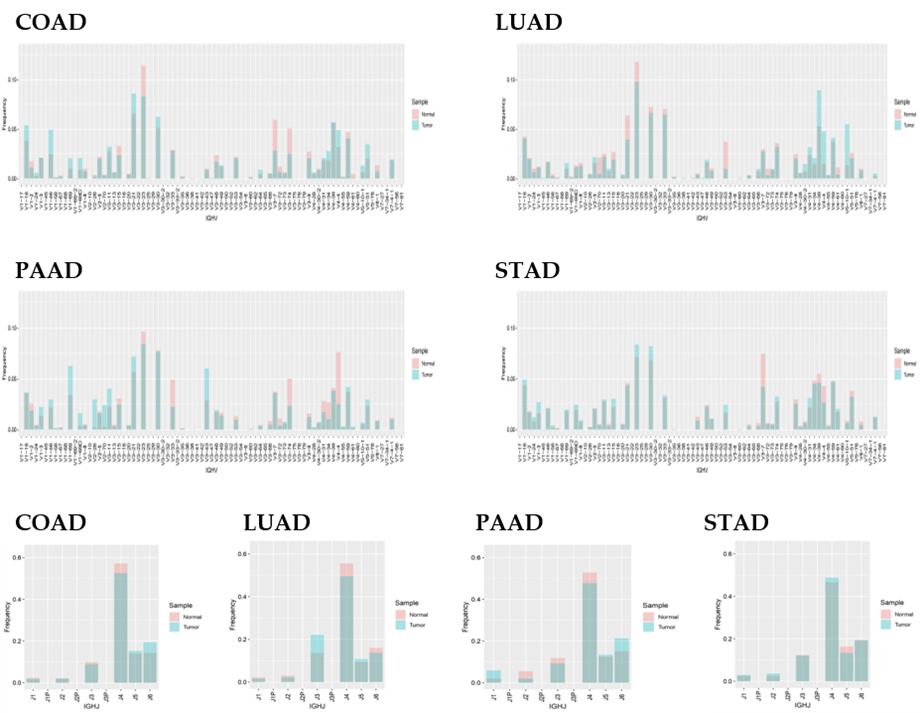


**Figure S3** The usage of IGHV and IGHJ


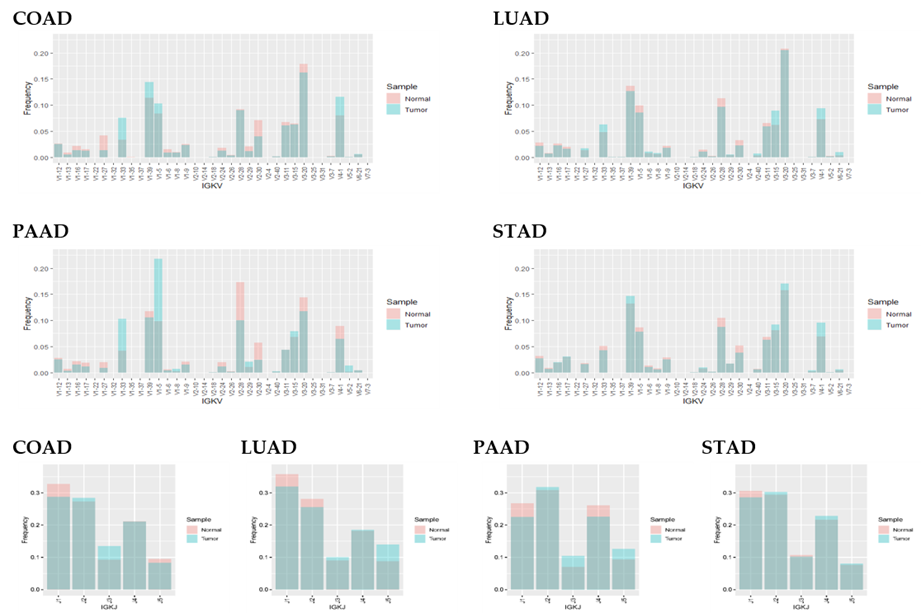


**Figure S4** The usage of IGKV and IGKJ


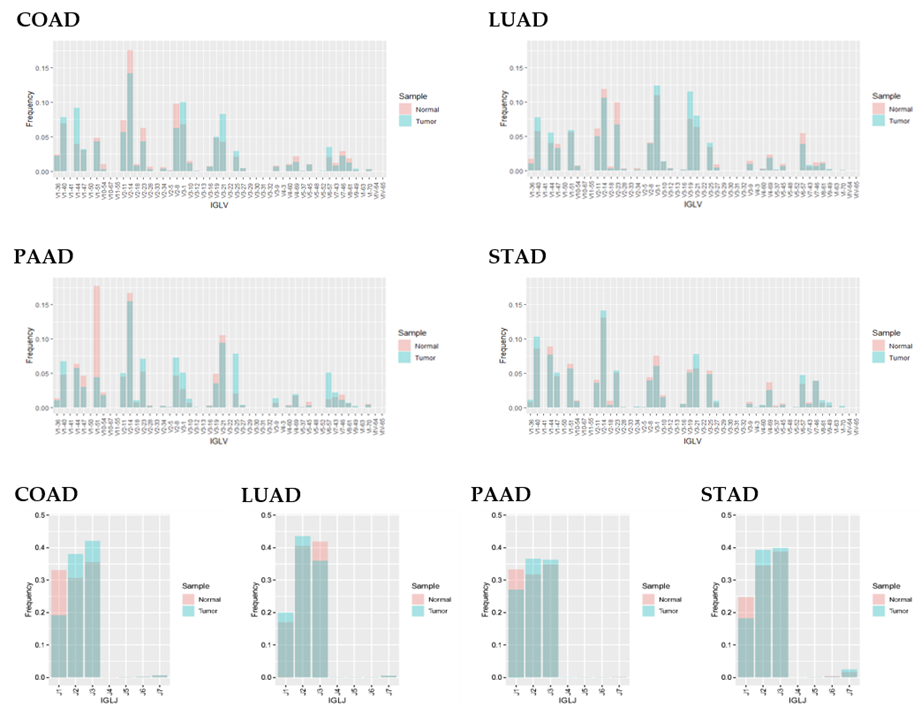


**Figure S5** The usage of IGLV and IGLJ
